# Supplementary material
Source: Springer Nature journal article supplement (https://www.springermedizin.de/resource/supplementary/12916_2012_600_MOESM2_ESM.pdf/9597952)

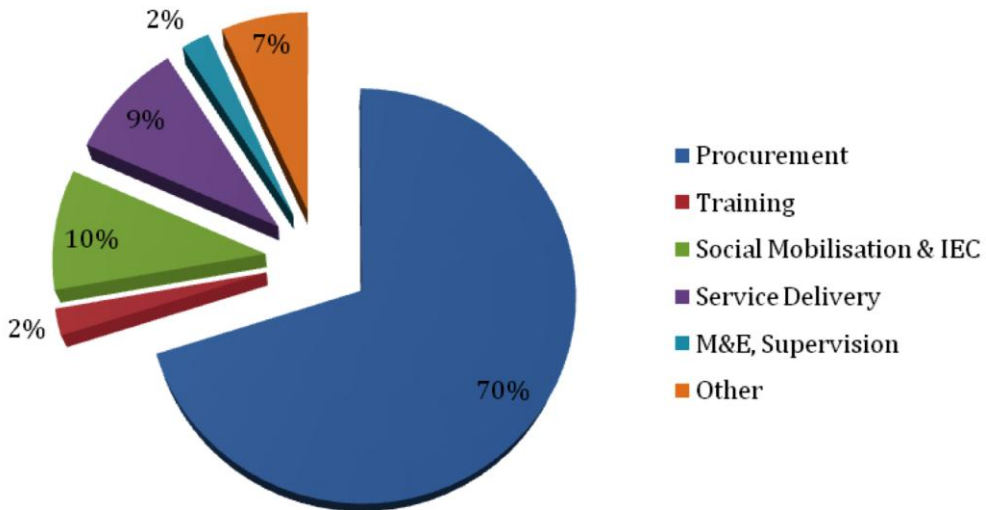

Supplement: MOESM2 [file 9597952]
